# Supplementary material
Source: PubMed Central journal article supplement (PMC3229118)
Supplement: gmb-34-1-624-gfigsuppl3.pdf [file gmb-34-1-624-gfigsuppl3.pdf]

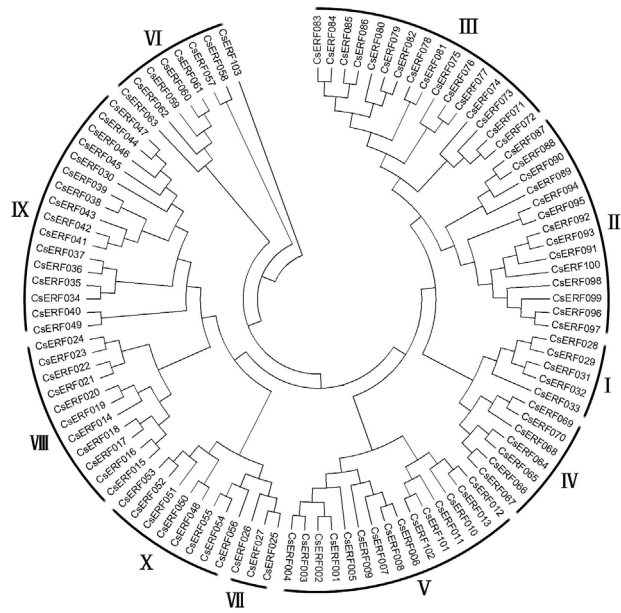

**Figure S3** - Phylogenetic analysis of 103 cucumber ERF proteins. A Maximum Parsimony (MP) tree was constructed using PHYLIP3.69, by multiple sequence alignment of 103 cucumber ERF protein sequences. 10 groups are marked I to X, as described by Nakano *et al.*, (2006).
