# Supplementary material
Source: PubMed Central journal article supplement (PMC3229118)
Supplement: gmb-34-1-624-gfigsuppl4.pdf [file gmb-34-1-624-gfigsuppl4.pdf]

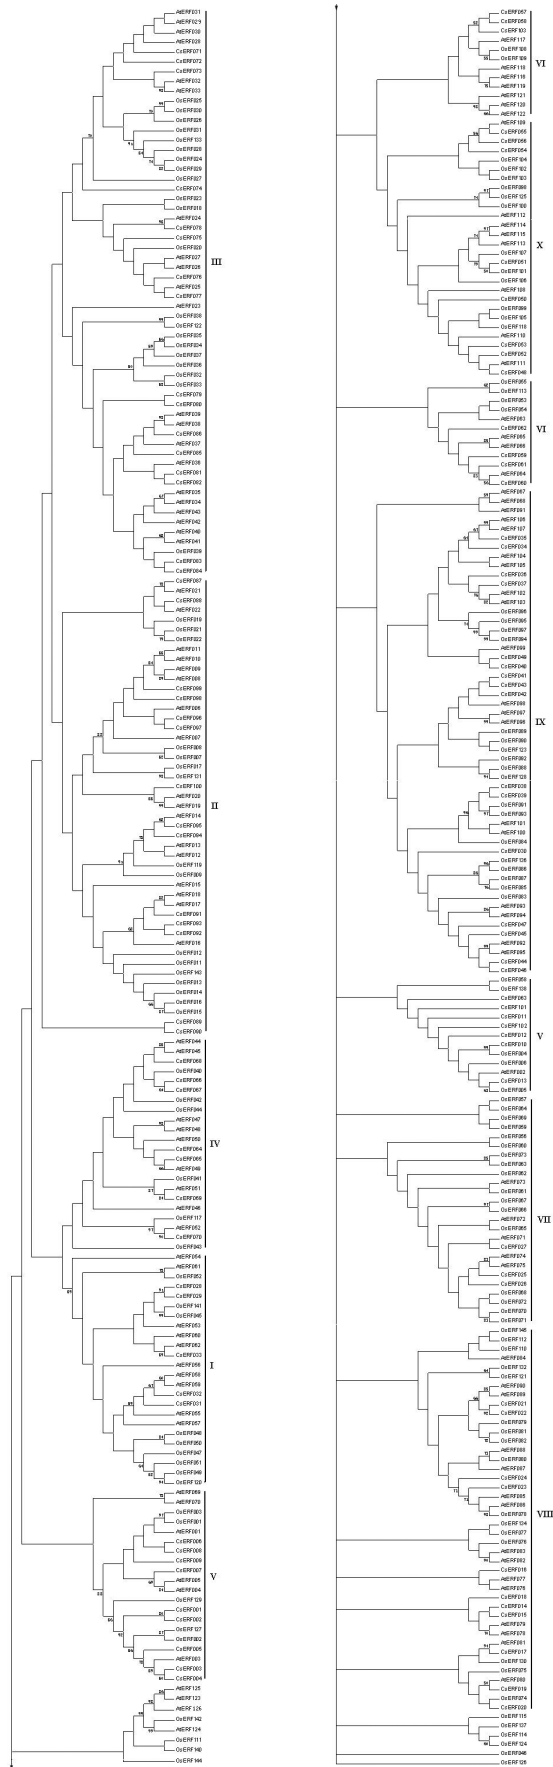

**Figure S4** - Comparative phylogenetic analysis of cucumber ERFs with those of Arabidopsis and rice. An unrooted neighbor-joining phylogenetic tree was constructed using MEGA4, by multiple sequence alignment. The 10 major groups are marked I to X, as described by Nakano *et al.*, (2006).
