# Supplementary material
Source: PubMed Central journal article supplement (PMC3229118)
Supplement: gmb-34-1-624-suppl1.pdf [file gmb-34-1-624-suppl1.pdf]

**Table S1** The *CsERF* genes identified in this study are listed according to their *CsERF* numbers defined by multiple sequence alignment (Figure S2).

| Serial No. | Gene Name       | Gene ID   | CuGI(5'-3')       | Length of chr (bp) | Chromosomal location | Length (a.a.) | No. of Introns | Group name |
|------------|-----------------|-----------|-------------------|--------------------|----------------------|---------------|----------------|------------|
| 1          | <i>CsERF001</i> | Csa002836 | 1350153-1349175   | 22434855           | 4                    | 180           | 1              | V          |
| 2          | <i>CsERF002</i> | Csa014841 | 15208734-15209357 | 22434855           | 4                    | 138           | 2              | V          |
| 3          | <i>CsERF003</i> | Csa005862 | 18494975-18495575 | 22000590           | 2                    | 164           | 1              | V          |
| 4          | <i>CsERF004</i> | Csa001957 | 15271088-15271957 | 17370973           | 7                    | 196           | 1              | V          |
| 5          | <i>CsERF005</i> | Csa005861 | 18488382-18489011 | 22000590           | 2                    | 175           | 1              | V          |
| 6          | <i>CsERF006</i> | Csa006854 | 631812-630472     | 22000590           | 2                    | 246           | 1              | V          |
| 7          | <i>CsERF007</i> | Csa002035 | 31922812-31923895 | 34445220           | 3                    | 194           | 1              | V          |
| 8          | <i>CsERF008</i> | Csa022657 | 8462-9248         | 13703              | Scaffold000393       | 223           | 1              | V          |
| 9          | <i>CsERF009</i> | Csa003049 | 1527385-1528304   | 22434855           | 4                    | 190           | 2              | V          |
| 10         | <i>CsERF010</i> | Csa009694 | 26544766-26545851 | 28091742           | 5                    | 361           | 0              | V          |
| 11         | <i>CsERF011</i> | Csa015404 | 19399419-19400496 | 28091742           | 5                    | 212           | 0              | V          |
| 12         | <i>CsERF012</i> | Csa020206 | 8143974-8143339   | 22434855           | 4                    | 211           | 0              | V          |
| 13         | <i>CsERF013</i> | Csa019531 | 316141-316866     | 319939             | Scaffold000131       | 241           | 0              | V          |
| 14         | <i>CsERF014</i> | Csa007982 | 17124858-17125502 | 26547709           | 6                    | 214           | 0              | VIII       |
| 15         | <i>CsERF015</i> | Csa011614 | 9915259-9915918   | 26547709           | 6                    | 219           | 0              | VIII       |
| 16         | <i>CsERF016</i> | Csa019805 | 3390113-3389469   | 34445220           | 3                    | 214           | 0              | VIII       |
| 17         | <i>CsERF017</i> | Csa016336 | 7651209-7651703   | 25430643           | 1                    | 164           | 0              | VIII       |
| 18         | <i>CsERF018</i> | Csa015626 | 19286010-19286591 | 22434855           | 4                    | 193           | 0              | VIII       |
| 19         | <i>CsERF019</i> | Csa003390 | 2180880-2180251   | 17370973           | 7                    | 209           | 0              | VIII       |
| 20         | <i>CsERF020</i> | Csa016229 | 7666682-7666047   | 25430643           | 1                    | 211           | 0              | VIII       |
| 21         | <i>CsERF021</i> | Csa000861 | 21263555-21264580 | 28091742           | 5                    | 341           | 0              | VIII       |
| 22         | <i>CsERF022</i> | Csa011398 | 14429466-14430542 | 22000590           | 2                    | 358           | 0              | VIII       |
| 23         | <i>CsERF023</i> | Csa003016 | 1119240-1119923   | 22434855           | 4                    | 227           | 0              | VIII       |
| 24         | <i>CsERF024</i> | Csa023463 | 3481-4167         | 6853               | Scaffold000677       | 228           | 0              | VIII       |
| 25         | <i>CsERF025</i> | Csa009872 | 16743027-16740950 | 17370973           | 7                    | 389           | 1              | VII        |
| 26         | <i>CsERF026</i> | Csa013360 | 22272823-22271143 | 34445220           | 3                    | 370           | 1              | VII        |
| 27         | <i>CsERF027</i> | Csa002799 | 1832463-1831545   | 22434855           | 4                    | 272           | 1              | VII        |
| 28         | <i>CsERF028</i> | Csa007704 | 7871002-7869906   | 26547709           | 6                    | 337           | 1              | I          |
| 29         | <i>CsERF029</i> | Csa003368 | 2420250-2419057   | 17370973           | 7                    | 397           | 0              | I          |
| 30         | <i>CsERF030</i> | Csa000642 | 24948986-24949513 | 26547709           | 6                    | 175           | 0              | IX         |
| 31         | <i>CsERF031</i> | Csa012067 | 22481978-22481499 | 26547709           | 6                    | 250           | 1              | I          |
| 32         | <i>CsERF032</i> | Csa011099 | 14386960-14385884 | 22434855           | 4                    | 358           | 0              | I          |
| 33         | <i>CsERF033</i> | Csa006177 | 9209327-9208125   | 22000590           | 2                    | 400           | 0              | I          |
| 34         | <i>CsERF034</i> | Csa016672 | 9166496-9167080   | 22434855           | 4                    | 194           | 0              | IX         |
| 35         | <i>CsERF035</i> | Csa012537 | 1252601-1253083   | 28091742           | 5                    | 160           | 0              | IX         |
| 36         | <i>CsERF036</i> | Csa012536 | 1247100-1247813   | 28091742           | 5                    | 237           | 0              | IX         |
| 37         | <i>CsERF037</i> | Csa017104 | 1586163-1585129   | 34445220           | 3                    | 344           | 0              | IX         |
| 38         | <i>CsERF038</i> | Csa002749 | 2287694-2286942   | 22434855           | 4                    | 250           | 0              | IX         |
| 39         | <i>CsERF039</i> | Csa017144 | 1669749-1670588   | 34445220           | 3                    | 279           | 0              | IX         |

|    |                 |           |                   |          |                |     |   |     |
|----|-----------------|-----------|-------------------|----------|----------------|-----|---|-----|
| 40 | <i>CsERF040</i> | Csa000407 | 6006431-6005958   | 34445220 | 3              | 157 | 0 | IX  |
| 41 | <i>CsERF041</i> | Csa015122 | 20933066-20933446 | 34445220 | 3              | 126 | 0 | IX  |
| 42 | <i>CsERF042</i> | Csa000150 | 8965136-8964735   | 34445220 | 3              | 133 | 0 | IX  |
| 43 | <i>CsERF043</i> | Csa019346 | 11809343-11809789 | 17370973 | 7              | 148 | 0 | IX  |
| 44 | <i>CsERF044</i> | Csa022480 | 10161945-10162631 | 22000590 | 2              | 228 | 0 | IX  |
| 45 | <i>CsERF045</i> | Csa000151 | 8945006-8944320   | 34445220 | 3              | 228 | 0 | IX  |
| 46 | <i>CsERF046</i> | Csa001354 | 18506357-18505683 | 34445220 | 3              | 224 | 0 | IX  |
| 47 | <i>CsERF047</i> | Csa019306 | 11796883-11796188 | 17370973 | 7              | 231 | 0 | IX  |
| 48 | <i>CsERF048</i> | Csa010078 | 20115512-20116789 | 26547709 | 6              | 338 | 1 | X   |
| 49 | <i>CsERF049</i> | Csa000408 | 6003134-6002700   | 34445220 | 3              | 144 | 0 | IX  |
| 50 | <i>CsERF050</i> | Csa005593 | 1951916-1955219   | 26547709 | 6              | 364 | 2 | X   |
| 51 | <i>CsERF051</i> | Csa008584 | 4931216-4930683   | 26547709 | 6              | 177 | 0 | X   |
| 52 | <i>CsERF052</i> | Csa018661 | 326047-327680     | 411159   | Scaffold000111 | 285 | 1 | X   |
| 53 | <i>CsERF053</i> | Csa008878 | 4066091-4064303   | 26547709 | 6              | 404 | 1 | X   |
| 54 | <i>CsERF054</i> | Csa010237 | 20921657-20921076 | 26547709 | 6              | 193 | 0 | VII |
| 55 | <i>CsERF055</i> | Csa003542 | 358765-357989     | 17370973 | 7              | 258 | 0 | VII |
| 56 | <i>CsERF056</i> | Csa008749 | 13733610-13732786 | 34445220 | 3              | 274 | 0 | VII |
| 57 | <i>CsERF057</i> | Csa008966 | 2537686-2538642   | 26547709 | 6              | 318 | 0 | VI  |
| 58 | <i>CsERF058</i> | Csa001015 | 23085965-23086894 | 28091742 | 5              | 309 | 0 | VI  |
| 59 | <i>CsERF059</i> | Csa020336 | 11118158-11119108 | 22434855 | 4              | 316 | 0 | VI  |
| 60 | <i>CsERF060</i> | Csa012752 | 15983553-15984509 | 28091742 | 5              | 318 | 0 | VI  |
| 61 | <i>CsERF061</i> | Csa019969 | 16219410-16220390 | 34445220 | 3              | 326 | 0 | VI  |
| 62 | <i>CsERF062</i> | Csa015455 | 19016343-19015537 | 28091742 | 5              | 268 | 0 | VI  |
| 63 | <i>CsERF063</i> | Csa007656 | 8048779-8049393   | 26547709 | 6              | 204 | 0 | VI  |
| 64 | <i>CsERF064</i> | Csa017883 | 30847250-30846696 | 34445220 | 3              | 184 | 0 | IV  |
| 65 | <i>CsERF065</i> | Csa003622 | 16252055-16252693 | 22000590 | 2              | 212 | 0 | IV  |
| 66 | <i>CsERF066</i> | Csa005696 | 1334610-1333345   | 26547709 | 6              | 421 | 0 | IV  |
| 67 | <i>CsERF067</i> | Csa007621 | 7427734-7428273   | 26547709 | 6              | 179 | 0 | IV  |
| 68 | <i>CsERF068</i> | Csa018854 | 12152362-12151250 | 22434855 | 4              | 370 | 0 | IV  |
| 69 | <i>CsERF069</i> | Csa002451 | 27503953-27503030 | 34445220 | 3              | 230 | 1 | IV  |
| 70 | <i>CsERF070</i> | Csa005700 | 1276290-1275373   | 26547709 | 6              | 305 | 0 | IV  |
| 71 | <i>CsERF071</i> | Csa012414 | 522938-522336     | 28091742 | 5              | 200 | 0 | III |
| 72 | <i>CsERF072</i> | Csa008861 | 11874380-11873739 | 34445220 | 3              | 213 | 0 | III |
| 73 | <i>CsERF073</i> | Csa012870 | 15262990-15262313 | 28091742 | 5              | 225 | 0 | III |
| 74 | <i>CsERF074</i> | Csa004675 | 25841918-25841304 | 34445220 | 3              | 204 | 0 | III |
| 75 | <i>CsERF075</i> | Csa012869 | 15277531-15276773 | 28091742 | 5              | 252 | 0 | III |
| 76 | <i>CsERF076</i> | Csa022610 | 8225-7716         | 15472    | Scaffold000379 | 169 | 0 | III |
| 77 | <i>CsERF077</i> | Csa008860 | 11887175-11886597 | 34445220 | 3              | 192 | 0 | III |
| 78 | <i>CsERF078</i> | Csa005091 | 25834056-25834607 | 34445220 | 3              | 183 | 0 | III |
| 79 | <i>CsERF079</i> | Csa000388 | 6224581-6224039   | 34445220 | 3              | 180 | 0 | III |
| 80 | <i>CsERF080</i> | Csa008546 | 5675974-5675333   | 26547709 | 6              | 213 | 0 | III |
| 81 | <i>CsERF081</i> | Csa023237 | 1739-1134         | 8810     | Scaffold000576 | 201 | 0 | III |
| 82 | <i>CsERF082</i> | Csa009843 | 17099285-17098680 | 17370973 | 7              | 201 | 0 | III |
| 83 | <i>CsERF083</i> | Csa021087 | 17482290-17481601 | 22000590 | 2              | 229 | 0 | III |

|     |                 |           |                   |          |                |     |   |     |
|-----|-----------------|-----------|-------------------|----------|----------------|-----|---|-----|
| 84  | <i>CsERF084</i> | Csa002191 | 33648340-33647657 | 34445220 | 3              | 227 | 0 | III |
| 85  | <i>CsERF085</i> | Csa018998 | 559702-560208     | 651424   | Scaffold000118 | 168 | 0 | III |
| 86  | <i>CsERF086</i> | Csa017112 | 1509830-1509186   | 34445220 | 3              | 214 | 0 | III |
| 87  | <i>CsERF087</i> | Csa009589 | 27747151-27746573 | 28091742 | 5              | 192 | 0 | II  |
| 88  | <i>CsERF088</i> | Csa009590 | 27726472-27725981 | 28091742 | 5              | 163 | 0 | II  |
| 89  | <i>CsERF089</i> | Csa009622 | 27355787-27355296 | 28091742 | 5              | 163 | 0 | II  |
| 90  | <i>CsERF090</i> | Csa003012 | 1044217-1044711   | 22434855 | 4              | 164 | 0 | II  |
| 91  | <i>CsERF091</i> | Csa012919 | 19140452-19139841 | 25430643 | 1              | 203 | 0 | II  |
| 92  | <i>CsERF092</i> | Csa013079 | 14191691-14192332 | 26547709 | 6              | 213 | 0 | II  |
| 93  | <i>CsERF093</i> | Csa009304 | 22349007-22348447 | 22434855 | 4              | 186 | 0 | II  |
| 94  | <i>CsERF094</i> | Csa008952 | 2719822-2719217   | 26547709 | 6              | 201 | 0 | II  |
| 95  | <i>CsERF095</i> | Csa011091 | 14097006-14097704 | 22434855 | 4              | 232 | 0 | II  |
| 96  | <i>CsERF096</i> | Csa011471 | 15315130-15315558 | 22000590 | 2              | 142 | 0 | II  |
| 97  | <i>CsERF097</i> | Csa009478 | 21425457-21425906 | 22434855 | 4              | 149 | 0 | II  |
| 98  | <i>CsERF098</i> | Csa020278 | 12479634-12480113 | 22000590 | 2              | 159 | 0 | II  |
| 99  | <i>CsERF099</i> | Csa010224 | 21063174-21062653 | 26547709 | 6              | 173 | 0 | II  |
| 100 | <i>CsERF100</i> | Csa005900 | 19222095-19222541 | 22000590 | 2              | 148 | 0 | II  |
| 101 | <i>CsERF101</i> | Csa005450 | 2122879-2123478   | 25430643 | 1              | 199 | 0 | V   |
| 102 | <i>CsERF102</i> | Csa000299 | 7196619-7195888   | 34445220 | 3              | 243 | 0 | V   |
| 103 | <i>CsERF103</i> | Csa004614 | 4193219-4194205   | 25430643 | 1              | 328 | 0 | VI  |
