# Supplementary material
Source: PubMed Central journal article supplement (PMC3229118)
Supplement: gmb-34-1-624-suppl2.pdf [file gmb-34-1-624-suppl2.pdf]

**Table S2** Summary of conserved motifs (CMs) within the CsERF family

| Serial No. | Gene Name       | Gene ID   | CuGI(5'-3')       | Length of chr (bp) | Chromosomal location | Length(a.a.) | No. of Introns |
|------------|-----------------|-----------|-------------------|--------------------|----------------------|--------------|----------------|
| 1          | <i>AtERF123</i> | At2g39250 | 16398009-16396740 | 19705359           | 2                    | 222          | 4              |
| 2          | <i>AtERF124</i> | At2g41710 | 17409981-17407352 | 19705359           | 2                    | 423          | 7              |
| 3          | <i>AtERF125</i> | At3g54990 | 20387499-20386013 | 23470805           | 3                    | 247          | 4              |
| 4          | <i>AtERF126</i> | At5g60120 | 24225379-24228293 | 26992728           | 5                    | 485          | 8              |
