# Supplementary material
Source: PubMed Central journal article supplement (PMC3229118)
Supplement: gmb-34-1-624-suppl3.pdf [file gmb-34-1-624-suppl3.pdf]

**Table S3** New *AtERF* and *OsERF* genes identified in this study are listed according to their *CsERF*

numbers.

| Serial No. | Gene Name       | Gene ID        | CuGI(5'-3')       | Length of chr (bp) | Chromosomal location | Length(a.a.) | No. of Introns |
|------------|-----------------|----------------|-------------------|--------------------|----------------------|--------------|----------------|
| 1          | <i>OsERF140</i> | LOC_Os02g29550 | 17571123-17576025 | 35930381           | 2                    | 222          | 5              |
| 2          | <i>OsERF141</i> | LOC_Os02g42585 | 25591508-25590087 | 35930381           | 2                    | 473          | 0              |
| 3          | <i>OsERF142</i> | LOC_Os05g32270 | 18749964-18754112 | 29894789           | 5                    | 348          | 7              |
| 4          | <i>OsERF143</i> | LOC_Os06g09717 | 4959148-4959771   | 31246789           | 6                    | 207          | 0              |
| 5          | <i>OsERF144</i> | LOC_Os10g26590 | 13791722-13792405 | 23134759           | 10                   | 227          | 0              |
| 6          | <i>OsERF145</i> | LOC_Os12g40960 | 25326352-25326768 | 27497214           | 12                   | 138          | 0              |
