# Supplementary material
Source: PubMed Central journal article supplement (PMC3229118)
Supplement: gmb-34-1-624-suppl4.pdf [file gmb-34-1-624-suppl4.pdf]

**Table S4** Information on the primers used in RT-PCR reactions.

| Primer name        | Sequence (5' to 3')       | Size (bp) |
|--------------------|---------------------------|-----------|
| <i>CsERF002_1F</i> | GGGTTTCGAAATTCGTCAT       | 215       |
| <i>CsERF002_1R</i> | CACCGCCGGTATAATCTCCT      |           |
| <i>CsERF003_1F</i> | GAGGCGTTCGTCAAAGACAT      | 239       |
| <i>CsERF003_1R</i> | ACGGTGGAGTTTAGCAGTCA      |           |
| <i>CsERF014_1F</i> | ATTCCATTCTCGCAGCAGTT      | 361       |
| <i>CsERF014_1R</i> | ACAGAGCAGTGGCATGAAGA      |           |
| <i>CsERF015_1F</i> | TGAGTGCGTTCAGGCTAATA      | 256       |
| <i>CsERF015_1R</i> | GTCCATCGGAGGTGGTAAGT      |           |
| <i>CsERF025_1F</i> | TTCAAGGATGATTCCGATTT      | 216       |
| <i>CsERF025_1R</i> | GATTCTGCTGCCCATTTAC       |           |
| <i>CsERF027_1F</i> | TCCGACATTGGCCTAACTC       | 240       |
| <i>CsERF027_1R</i> | TTCCTCAGCCGTATTGAAAG      |           |
| <i>CsERF028_1F</i> | GAAGAAGAAGCCTCACAAGC      | 270       |
| <i>CsERF028_1R</i> | TGGGCAAGATGAAGAAGAAG      |           |
| <i>CsERF030_1F</i> | GGGGTAAATACGCTGCCGAGAT    | 216       |
| <i>CsERF030_1R</i> | GCTTCCTCTTCGACGGTGGG      |           |
| <i>CsERF031_1F</i> | AGACTCTGGCTTGGGACCTT      | 223       |
| <i>CsERF031_1R</i> | ACTCCTTCACCCATTGAGA       |           |
| <i>CsERF034_1F</i> | GAAAGTCGCCGTGGTAGAGG      | 183       |
| <i>CsERF034_1R</i> | AACGCCGCACAGTCATAAGC      |           |
| <i>CsERF048_1F</i> | TCTTCCTCTGTTCTGCTCCCG     | 182       |
| <i>CsERF048_1R</i> | ACCGTTGCCGACCCTGTTTG      |           |
| <i>CsERF051_1F</i> | CCTGCCAGTATTGCTGCTCC      | 254       |
| <i>CsERF051_1R</i> | TCACCGTAACGATCCTGATCTTCT  |           |
| <i>CsERF057_1F</i> | ATCAATGGATGTA ACTACCAGCAC | 247       |
| <i>CsERF057_1R</i> | GTAGGCTTGGGAGGCTTCTT      |           |
| <i>CsERF058_1F</i> | GAAGAAGCAAAGGGAGTGG       | 337       |
| <i>CsERF058_1R</i> | TGGGTTTCATCATCAGCGAGT     |           |
| <i>CsERF067_1F</i> | AAATTCGAGCACCGAATAGA      | 287       |
| <i>CsERF067_1R</i> | AACTGCACAATCCTCAGACAG     |           |
| <i>CsERF068_1F</i> | AGAAAGGCACTCGTTTATGG      | 200       |
| <i>CsERF068_1R</i> | CGAAGAAGAAGAGGAGGAAG      |           |
| <i>CsERF072_1F</i> | TGTCTCAATTCGCCGATTC       | 242       |
| <i>CsERF072_1R</i> | GCCATATCCTCCAACAATCC      |           |
| <i>CsERF073_1F</i> | GAGCCGAATAAGAAGACGAG      | 352       |
| <i>CsERF073_1R</i> | AAGATGGAGGAGATAGCAGTAG    |           |
| <i>CsERF087_1F</i> | GAACCAGGAAAGAAGACGAGG     | 120       |
| <i>CsERF087_1R</i> | TGGGAAGTTGAGGCGAGCAT      |           |
| <i>CsERF089_1F</i> | ATTCTCAACTCCCTGACTCTGT    | 225       |
| <i>CsERF089_1R</i> | GCCAAGTAGACCCAACCTCA      |           |
| <i>CsACTIN_F</i>   | GACATTCAATGTGCCTGCTATG    | 161       |
| <i>CsACTIN_R</i>   | CATACCGATGAGAGATGGCTG     |           |
